# Supplementary material
Source: PubMed Central journal article supplement (PMC8846464)
Supplement: aac.01676-21-s0001.pdf [file aac.01676-21-s0001.pdf]

## **Supporting Information for**

# Assessment of activity and resistance mechanisms to cefepime in combination with the novel $\beta$ -lactamase inhibitors zidebactam, taniborbactam, and enmetazobactam against a multicenter collection of carbapenemase-producing Enterobacterales

Juan Carlos Vázquez-Ucha, Cristina Lasarte-Monterrubio, Paula Guijarro-Sánchez, Marina Oviaño, Laura Álvarez-Fraga, Isaac Alonso-García, Jorge Arca-Suárez, German Bou and Alejandro Beceiro on behalf of the GEMARA-SEIMC/REIPI Enterobacterales Study Group

### Table of contents:

|                |    |
|----------------|----|
| Figure S1..... | 2  |
| Figure S2..... | 3  |
| Figure S3..... | 4  |
| Table S1.....  | 5  |
| Table S2.....  | 12 |
| Table S3.....  | 14 |
| Table S4.....  | 15 |

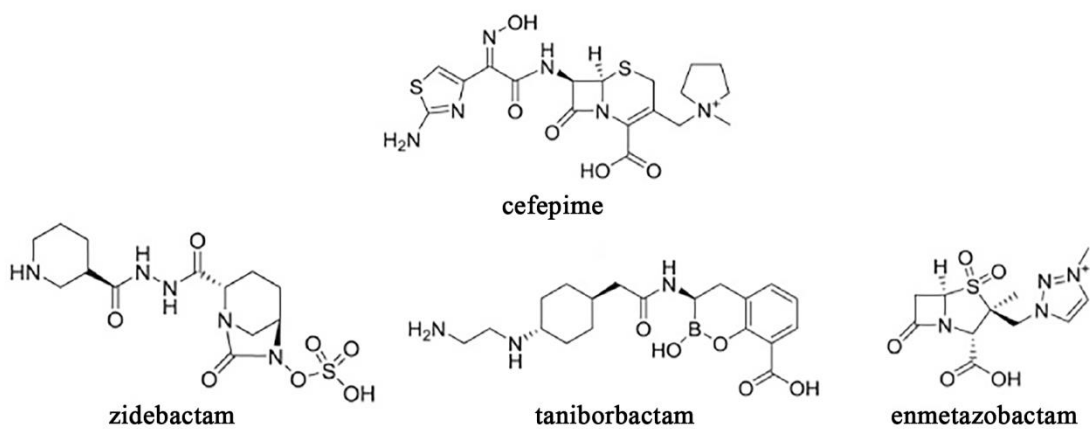

**Figure S1.** Structure of cephalosporin cefepime and  $\beta$ -lactamase inhibitors zidebactam (diazabicyclooctane), taniborbactam (boronate) and enmetazobactam (penicillanic acid sulfone).

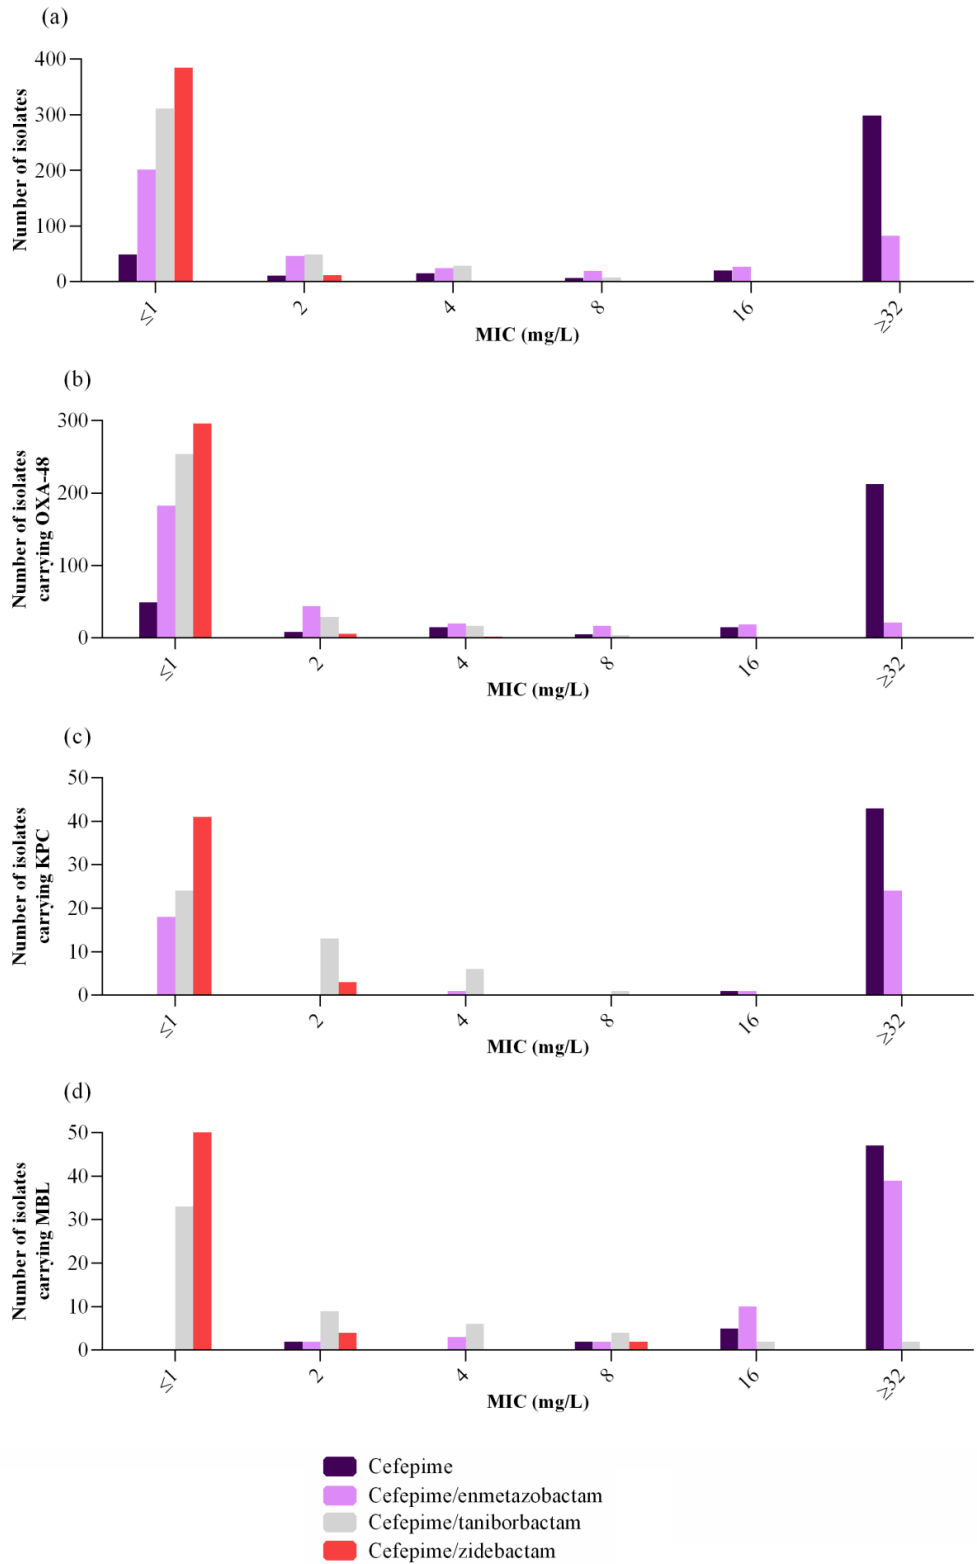

**Figure S2.** Distribution of MIC values for cefepime and cefepime/BLI combinations: cefepime/enmetazobactam, cefepime/taniborbactam and cefepime/zidebactam among a) the whole set of isolates of Enterobacterales (n=400), b) OXA-48-producing isolates (n=304), c) KPC-producing isolates (n=44) and d) MBL-producing isolates (n=56).

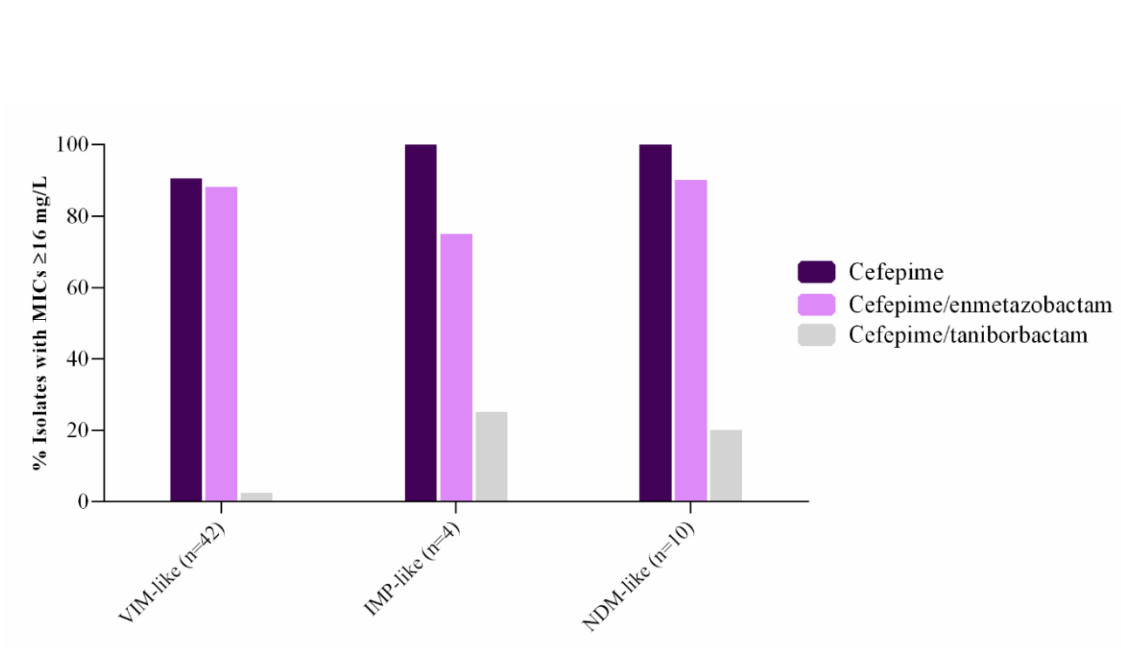

**Figure S3.** Rates of VIM-, IMP- and NDM-producing (MBLs) Enterobacteriales showing MIC  $\geq 16$  mg/L for cefepime and cefepime/BLIs (none of the strains showed MIC  $\geq 16$  mg/L for cefepime/zidebactam).















|        |                           |     |             |                                             |        |      |      |      |      |      |      |      |       |   |   |   |   |   |   |   |         |              |          |       |  |
|--------|---------------------------|-----|-------------|---------------------------------------------|--------|------|------|------|------|------|------|------|-------|---|---|---|---|---|---|---|---------|--------------|----------|-------|--|
| AN2350 | <i>K. pneumoniae</i>      | 15  | Urine       | Hospital Universitario Lucus Augusti (Lugo) | OXA-48 | ≤0.5 | ≤0.5 | ≤0.5 | ≤0.5 | ≥128 | 128  | 0.25 | 0.5   | S | S | S | S | R | S | S | SHV-28  |              |          |       |  |
| AN2351 | <i>C. koseri</i>          | 0   | Anal-rectal | Hospital Universitario Lucus Augusti (Lugo) | OXA-48 | ≤0.5 | ≤0.5 | ≤0.5 | ≤0.5 | ≤0.5 | ≥256 | 0.5  | 0.5   | S | S | S | S | R | S | S | TEM-1   |              |          |       |  |
| AN2352 | <i>K. pneumoniae</i>      | 147 | Sputum      | Hospital Universitario Lucus Augusti (Lugo) | OXA-48 | ≥128 | 32   | 4    | ≤0.5 | ≤0.5 | ≥256 | 16   | 2     | R | R | I | S | R | R | I | SHV-11  | (2x)CTX-M-15 |          |       |  |
| AN2353 | <i>C. koseri</i>          | 0   | Anal-rectal | Hospital Universitario Lucus Augusti (Lugo) | OXA-48 | ≤0.5 | ≤0.5 | ≤0.5 | ≤0.5 | ≤0.5 | ≥256 | 0.25 | 0.5   | S | S | S | S | R | S | S |         |              |          |       |  |
| AN2355 | <i>K. pneumoniae</i>      | 307 | Anal-rectal | Hospital Universitario Lucus Augusti (Lugo) | OXA-48 | ≥128 | ≤0.5 | 1    | ≤0.5 | ≤0.5 | ≥256 | 0.25 | 0.5   | R | S | S | S | R | S | S | SHV-28  | (5x)CTX-M-15 | OXA-1    | TEM-1 |  |
| AN2356 | <i>K. pneumoniae</i>      | 15  | Urine       | Hospital Universitario Lucus Augusti (Lugo) | OXA-48 | 2    | 2    | ≤0.5 | ≤0.5 | ≤0.5 | ≥256 | 0.5  | 0.5   | S | S | S | S | R | S | S | SHV-28  |              |          |       |  |
| AN2357 | <i>K. pneumoniae</i>      | 15  | Urine       | Hospital Universitario Lucus Augusti (Lugo) | OXA-48 | ≥128 | 16   | 2    | ≤0.5 | ≤0.5 | ≥256 | 32   | 16    | R | R | S | S | R | R | R | SHV-28  | OXA-1        | CTX-M-15 |       |  |
| AN2358 | <i>K. pneumoniae</i>      | 15  | Urine       | Hospital Universitario Lucus Augusti (Lugo) | OXA-48 | ≥128 | 1    | 2    | ≤0.5 | ≤0.5 | ≥256 | 1    | 0.5   | R | S | S | S | R | S | S | SHV-28  | OXA-1        | CTX-M-15 | TEM-1 |  |
| AN2360 | <i>E. cloacae</i> complex | 93  | Abscess     | Hospital Arquitecto Marcide (Ferrol)        | VIM-1  | ≥128 | 64   | 1    | ≤0.5 | ≤0.5 | 128  | 0.5  | 2     | R | R | S | S | R | S | I | ACT-17  | (2x)ACC-1    | OXA-1    |       |  |
| AN2361 | <i>K. pneumoniae</i>      | 15  | Urine       | Hospital Arquitecto Marcide (Ferrol)        | OXA-48 | ≥128 | 16   | 1    | ≤0.5 | ≤0.5 | 128  | 1    | 1     | R | R | S | S | R | S | S | SHV-28  | OXA-1        | CTX-M-15 | TEM-1 |  |
| AN2362 | <i>K. pneumoniae</i>      | 11  | Anal-rectal | Hospital Arquitecto Marcide (Ferrol)        | OXA-48 | 1    | ≤0.5 | ≤0.5 | ≤0.5 | ≤0.5 | ≥256 | 2    | 0.5   | S | S | S | S | R | I | S | SHV-11  | OXA-1        |          |       |  |
| AN2363 | <i>K. oxytoca</i>         | 328 | Anal-rectal | Hospital Arquitecto Marcide (Ferrol)        | OXA-48 | ≤0.5 | ≤0.5 | ≤0.5 | ≤0.5 | ≤0.5 | ≥256 | 0.25 | 0.5   | S | S | S | S | R | S | S | OXY-2-7 |              |          |       |  |
| AN2364 | <i>E. cloacae</i> complex | 168 | Urine       | Hospital Arquitecto Marcide (Ferrol)        | OXA-48 | 2    | 1    | ≤0.5 | ≤0.5 | ≤0.5 | ≥256 | 1    | ≤0.25 | S | S | S | S | R | S | S | ACT-23  | DHA-1        |          |       |  |

**Table S2.** Bacterial species, sequence type, susceptibilities to cefepime and cefepime/enmetazobactam of KPC-producing Enterobacterales.

| Genome no. | Species              | ST  | MIC (mg/L) |                     | Carbapenemase | Other $\beta$ -lactamases |                                              | Porins | PBP <sub>s</sub> | Transcription regulators AcrAB-ToIC |
|------------|----------------------|-----|------------|---------------------|---------------|---------------------------|----------------------------------------------|--------|------------------|-------------------------------------|
|            |                      |     | cefepime   | cefepime/enmetazob. |               | ESBL $\beta$ -lactamases  | No ESBL $\beta$ -lactamases                  |        |                  |                                     |
| AI2588     | <i>K. pneumoniae</i> | 512 | 32         | $\leq 0,5$          | KPC-3         | TEM-1, SHV-11             | OmpK35 NF (E42fs)                            | -      | -                |                                     |
| AI2627     | <i>K. pneumoniae</i> | 512 | $\geq 128$ | $\geq 128$          | KPC-3         | TEM-1, SHV-11             | OmpK35 NF (E42fs)<br>OmpK36 (G134_D135insGD) | -      | -                |                                     |
| AI2628     | <i>K. pneumoniae</i> | 512 | $\geq 128$ | $\geq 128$          | KPC-3         | TEM-1, SHV-11             | OmpK35 NF (E42fs)<br>OmpK36 (G134_D135insGD) | -      | -                |                                     |
| AI2629     | <i>K. pneumoniae</i> | 512 | $\geq 128$ | $\geq 128$          | KPC-3         | TEM-1, SHV-11             | OmpK35 NF (E42fs)<br>OmpK36 (G134_D135insGD) | -      | -                |                                     |
| AI2631     | <i>K. pneumoniae</i> | 512 | $\geq 128$ | $\geq 128$          | KPC-3         | TEM-1, SHV-11             | OmpK35 NF (E42fs)<br>OmpK36 (G134_D135insGD) | -      | -                |                                     |
| AI2632     | <i>K. pneumoniae</i> | 512 | $\geq 128$ | $\geq 128$          | KPC-3         | TEM-1, SHV-11             | OmpK35 NF (E42fs)<br>OmpK36 (G134_D135insGD) | -      | -                |                                     |
| AI2805     | <i>K. pneumoniae</i> | 512 | $\geq 128$ | $\geq 128$          | KPC-3         | TEM-1,<br>(2x)SHV-11      | OmpK35 NF (E42fs)<br>OmpK36 (G134_D135insGD) | -      | -                |                                     |
| AI2806     | <i>K. pneumoniae</i> | 512 | $\geq 128$ | $\geq 128$          | KPC-3         | TEM-1,<br>(2x)SHV-11      | OmpK35 NF (E42fs)<br>OmpK36 (G134_D135insGD) | -      | -                |                                     |
| AI2807     | <i>K. pneumoniae</i> | 512 | $\geq 128$ | $\geq 128$          | KPC-3         | TEM-1, SHV-11             | OmpK35 NF (E42fs)<br>OmpK36 (G134_D135insGD) | -      | -                |                                     |
| AI2808     | <i>K. pneumoniae</i> | 512 | $\geq 128$ | $\geq 128$          | KPC-3         | TEM-1,<br>(2x)SHV-11      | OmpK35 NF (E42fs)<br>OmpK36 (G134_D135insGD) | -      | -                |                                     |
| AI2809     | <i>K. pneumoniae</i> | 512 | $\geq 128$ | $\geq 128$          | KPC-3         | TEM-1,<br>(2x)SHV-11      | OmpK35 NF (E42fs)<br>OmpK36 (G134_D135insGD) | -      | -                |                                     |
| AI2810     | <i>K. pneumoniae</i> | 512 | $\geq 128$ | $\geq 128$          | KPC-3         | TEM-1,<br>(2x)SHV-11      | OmpK35 NF (E42fs)<br>OmpK36 (G134_D135insGD) | -      | -                |                                     |
| AI2811     | <i>K. pneumoniae</i> | 512 | $\geq 128$ | $\geq 128$          | KPC-3         | TEM-1,<br>(2x)SHV-11      | OmpK35 NF (E42fs)<br>OmpK36 (G134_D135insGD) | -      | -                |                                     |
| AI2812     | <i>K. pneumoniae</i> | 512 | $\geq 128$ | $\geq 128$          | KPC-3         | TEM-1,<br>(2x)SHV-11      | OmpK35 NF (E42fs)<br>OmpK36 (G134_D135insGD) | -      | -                |                                     |
| AI2813     | <i>K. pneumoniae</i> | 512 | $\geq 128$ | $\geq 128$          | KPC-3         | TEM-1,<br>(2x)SHV-11      | OmpK35 NF (E42fs)<br>OmpK36 (G134_D135insGD) | -      | -                |                                     |
| AI2814     | <i>K. pneumoniae</i> | 512 | $\geq 128$ | $\geq 128$          | KPC-3         | SHV-11                    | OmpK35 NF (E42fs)<br>OmpK36 (G134_D135insGD) | -      | -                |                                     |
| AI2815     | <i>K. pneumoniae</i> | 512 | $\geq 128$ | $\geq 128$          | KPC-3         | SHV-11                    | OmpK35 NF (E42fs)<br>OmpK36 (G134_D135insGD) | -      | -                |                                     |
| AI2816     | <i>K. pneumoniae</i> | 512 | $\geq 128$ | $\geq 128$          | KPC-3         | TEM-1,<br>(2x)SHV-11      | OmpK35 NF (E42fs)<br>OmpK36 (G134_D135insGD) | -      | -                |                                     |
| AI2817     | <i>K. pneumoniae</i> | 512 | $\geq 128$ | $\geq 128$          | KPC-3         | TEM-1, SHV-11             | OmpK35 NF (E42fs)<br>OmpK36 (G134_D135insGD) | -      | -                |                                     |
| AI2835     | <i>K. pneumoniae</i> | 512 | $\geq 128$ | $\geq 128$          | KPC-3         | TEM-1, SHV-11             | OmpK35 NF (E42fs)<br>OmpK36 (G134_D135insGD) | -      | -                |                                     |
| AI2836     | <i>K. pneumoniae</i> | 512 | $\geq 128$ | $\geq 128$          | KPC-3         | TEM-1, SHV-11             | OmpK35 NF (E42fs)<br>OmpK36 (G134_D135insGD) | -      | -                |                                     |
| AI2837     | <i>K. pneumoniae</i> | 512 | $\geq 128$ | $\geq 128$          | KPC-3         | TEM-1, SHV-11             | OmpK35 NF (E42fs)<br>OmpK36 (G134_D135insGD) | -      | -                |                                     |
| AI2940     | <i>K. pneumoniae</i> | 258 | $\geq 128$ | $\geq 128$          | KPC-3         | TEM-1, SHV-11             | OmpK35 NF (E42fs)                            | -      | -                |                                     |
| AI2643     | <i>K. pneumoniae</i> | 307 | 16         | $\leq 0,5$          | KPC-3         | SHV-28                    | OXA-1                                        | -      | -                |                                     |
| AI2644     | <i>K. pneumoniae</i> | 307 | $\geq 128$ | $\leq 0,5$          | KPC-3         | SHV-28,<br>CTX-M-15       | OXA-1,<br>(2x)TEM-1                          | -      | -                |                                     |
| AI2645     | <i>K. pneumoniae</i> | 307 | 64         | $\leq 0,5$          | KPC-3         | SHV-28,<br>CTX-M-15       | OXA-1, TEM-1                                 | -      | -                |                                     |

|        |                      |     |      |      |                |                             |                       |                      |                  |                    |
|--------|----------------------|-----|------|------|----------------|-----------------------------|-----------------------|----------------------|------------------|--------------------|
| AI2646 | <i>K. pneumoniae</i> | 307 | 64   | ≤0,5 | KPC-3          | CTX-M-15,<br>SHV-28         | OXA-1,<br>(2x)TEM-1   | -                    | -                | -                  |
| AI2647 | <i>K. pneumoniae</i> | 307 | 64   | ≤0,5 | KPC-3          | CTX-M-15,<br>SHV-28         | OXA-1,<br>(2x)TEM-1   | -                    | -                | -                  |
| AI2648 | <i>K. pneumoniae</i> | 307 | ≥128 | ≤0,5 | KPC-3          | CTX-M-15,<br>SHV-28         | OXA-1,<br>(2x)TEM-1   | -                    | -                | -                  |
| AI2649 | <i>K. pneumoniae</i> | 307 | ≥128 | 1    | KPC-3          | (2x)CTX-<br>M-15,<br>SHV-28 | OXA-1, TEM-1          | -                    | -                | -                  |
| AI2650 | <i>K. pneumoniae</i> | 307 | 64   | ≤0,5 | KPC-3          | CTX-M-15,<br>SHV-28         | OXA-1,<br>(2x)TEM-1   | -                    | -                | -                  |
| AI2651 | <i>K. pneumoniae</i> | 459 | 32   | ≤0,5 | KPC-3          |                             | SHV-26,<br>(2x)TEM-30 | -                    | PBP-3<br>(P372R) | AcrR NF<br>(Y194*) |
| AI2652 | <i>K. pneumoniae</i> | 307 | 32   | ≤0,5 | KPC-3          | CTX-M-15,<br>SHV-28         | OXA-1,<br>(2x)TEM-1   | -                    | -                | -                  |
| AI2653 | <i>K. pneumoniae</i> | 307 | 32   | ≤0,5 | KPC-3          | CTX-M-15,<br>SHV-28         | OXA-1,<br>(2x)TEM-1   | -                    | -                | -                  |
| AI2654 | <i>K. pneumoniae</i> | 307 | 32   | ≤0,5 | KPC-3          | CTX-M-15,<br>SHV-28         | OXA-1, TEM-1          | -                    | -                | -                  |
| AI2655 | <i>K. pneumoniae</i> | 307 | 32   | ≤0,5 | KPC-3          | CTX-M-15,<br>SHV-28         | OXA-1,<br>(2x)TEM-1   | -                    | -                | -                  |
| AI2883 | <i>K. pneumoniae</i> | 307 | 64   | 1    | KPC-3          | SHV-28                      | OXA-1, TEM-1          | -                    | -                | -                  |
| AI2888 | <i>K. pneumoniae</i> | 15  | 64   | ≤0,5 | OXA-<br>48+KPC | CTX-M-15,<br>SHV-28         |                       | -                    | -                | -                  |
| AI2889 | <i>K. pneumoniae</i> | 307 | 32   | ≤0,5 | KPC-3          | CTX-M-15,<br>SHV-28         | OXA-1,<br>(2x)TEM-1   | -                    | -                | -                  |
| AI2901 | <i>K. pneumoniae</i> | 307 | 32   | ≤0,5 | KPC-3          | SHV-28                      | (2x)TEM-1             | -                    | -                | -                  |
| AI2602 | <i>C. freundii</i>   | 112 | ≥128 | ≥128 | KPC-2          |                             | CMY-like,<br>OXA-1    | OmpK35 NF (Q174*)    | PBP3<br>(A310V)  | -                  |
| AI2614 | <i>K. oxytoca</i>    | 324 | 32   | 4    | KPC-2          | CTX-M-9,<br>OXY-1-like      | SHV-12                | -                    | -                | -                  |
| AI2826 | <i>C. freundii</i>   | 22  | ≥128 | 64   | KPC-2          |                             | CMY-48                | OmpK35 NF<br>(A49fs) | -                | -                  |

(2x): indicates that the strain has 2 copies of the gene coding for the specified β-lactamase. NF: indicates non-functional; asterisk (\*): indicates premature stop codon; fs: indicates frameshifts

**Table S3.** Bacterial species, sequence type, susceptibilities to cefepime and cefepime/enmetazobactam of MBL-producing Enterobacterales showing low MIC values for cefepime/enmetazobactam (MIC <16mg/L).

| Genome no. | Species              | MLST | MIC (mg/L) |                   | Carbapenemase | Other $\beta$ -lactamases |                              | Porins | PBPs | Transcription regulators<br>AcrAB-TolC |
|------------|----------------------|------|------------|-------------------|---------------|---------------------------|------------------------------|--------|------|----------------------------------------|
|            |                      |      | Cefepime   | Cefepime-enmetaz. |               | ESBL $\beta$ -lactamases  | Non-ESBL $\beta$ -lactamases |        |      |                                        |
| AI2830     | <i>K. pneumoniae</i> | 147  | 16         | 4                 | NDM-1         | CTX-M-15                  | SHV-11                       | -      | -    | -                                      |
| AI2885     | <i>K. pneumoniae</i> | 307  | 32         | 4                 | VIM-1         | CTX-M-15,<br>SHV-28       | TEM-1                        | -      | -    | RamR<br>(I88N,<br>A110E)               |

**Table S4.** Bacterial species, sequence type, susceptibilities to cefepime and cefepime/enmetazobactam of OXA-48-producing Enterobacterales showing high MIC values for cefepime/enmetazobactam (MIC  $\geq$ 16mg/L).

| Genome no. | Species                   | ST   | MIC (mg/L) |                         | Carbapenemase | Other $\beta$ -lactamases    |                                 | Porins                        | PBPs          | Transcription regulators<br>AcrAB-TolC |
|------------|---------------------------|------|------------|-------------------------|---------------|------------------------------|---------------------------------|-------------------------------|---------------|----------------------------------------|
|            |                           |      | cefepime   | cefepime/<br>enmetazob. |               | ESBL $\beta$ -<br>lactamases | No ESBL $\beta$ -<br>lactamases |                               |               |                                        |
| AH0326     | <i>K. pneumoniae</i>      | 392  | $\geq$ 128 | 32                      | OXA-48        | (2x)CTX-M-15                 | TEM-1, SHV-11                   | -                             | -             | -                                      |
| AI2585     | <i>K. pneumoniae</i>      | 405  | $\geq$ 128 | 32                      | OXA-48        | SHV-76, CTX-M-15             | OXA-1, TEM-1                    | -                             | -             | -                                      |
| AI2600     | <i>K. pneumoniae</i>      | 405  | $\geq$ 128 | 64                      | OXA-48        | SHV-76, (4x)CTX-M-15         | OXA-1, TEM-1                    | OmpK36 (L9M)                  | -             | -                                      |
| AI2624     | <i>E. cloacae</i> complex | 114  | 32         | 32                      | OXA-48        |                              | ACT-like                        | -                             | -             | -                                      |
| AI2638     | <i>K. pneumoniae</i>      | 307  | 64         | 32                      | OXA-48        | SHV-28, CTX-M-15             | TEM-1                           | OmpK35 NF (Y117*)             | -             | RamR (P159A)                           |
| AI2662     | <i>E. cloacae</i> complex | 171  | $\geq$ 128 | 32                      | OXA-48        | CTX-M-9, (2x)CTX-M-15        | (2x)OXA-1, ACT-25               | -                             | -             | -                                      |
| AI2668     | <i>C. freundii</i>        | 18   | 32         | 16                      | OXA-48        | CTX-M-9, SHV-12              | CMY-117, TEM-1                  | -                             | -             | -                                      |
| AI2739     | <i>K. pneumoniae</i>      | 11   | $\geq$ 128 | 32                      | OXA-48        | (2x)CTX-M-15                 | OXA-1, SHV-11, TEM-1            | -                             | -             | RamR NF (D75fs)                        |
| AI2756     | <i>K. pneumoniae</i>      | 11   | $\geq$ 128 | 64                      | OXA-48        | (3x)CTX-M-15                 | SHV-11                          | -                             | -             | RamR NF (D75fs)                        |
| AI2761     | <i>K. pneumoniae</i>      | 5000 | $\geq$ 128 | 16                      | OXA-48        | (2x)CTX-M-15                 | OXA-1, TEM-1, SHV-11            | -                             | -             | RamR NF (D75fs)                        |
| AI2765     | <i>K. pneumoniae</i>      | 147  | $\geq$ 128 | 64                      | OXA-48        | (2x)CTX-M-15                 | SHV-11                          | OmpK36 (G134_D135insGD)       | -             | -                                      |
| AI2773     | <i>K. pneumoniae</i>      | 307  | $\geq$ 128 | 16                      | OXA-48        | SHV-28, CTX-M-15             | DHA-like, TEM-1                 | -                             | -             | -                                      |
| AI2829     | <i>K. pneumoniae</i>      | 15   | $\geq$ 128 | 16                      | OXA-48        | SHV-28, CTX-M-15             | OXA-1                           | -                             | -             | -                                      |
| AI2838     | <i>K. pneumoniae</i>      | 307  | $\geq$ 128 | $\geq$ 128              | OXA-48        | SHV-28, CTX-M-15             |                                 | -                             | -             | -                                      |
| AI2847     | <i>K. pneumoniae</i>      | 307  | $\geq$ 128 | $\geq$ 128              | OXA-48        | SHV-28, CTX-M-15             | TEM-1                           | -                             | -             | -                                      |
| AI2849     | <i>K. pneumoniae</i>      | 147  | $\geq$ 128 | 16                      | OXA-48        | (2x)CTX-M-15                 | SHV-11                          | OmpK36 (G134_D135insGD)       | -             | -                                      |
| AI2855     | <i>K. pneumoniae</i>      | 147  | $\geq$ 128 | $\geq$ 128              | OXA-48        | (2x)CTX-M-15                 | SHV-11                          | -                             | -             | -                                      |
| AI2856     | <i>K. pneumoniae</i>      | 147  | $\geq$ 128 | 16                      | OXA-48        | (2x)CTX-M-15                 | SHV-11                          | -                             | -             | -                                      |
| AI2862     | <i>K. pneumoniae</i>      | 405  | $\geq$ 128 | 32                      | OXA-48        | (4x)CTX-M-15                 | SHV-76, (2x)OXA-1, TEM-1        | -                             | -             | -                                      |
| AI2871     | <i>K. pneumoniae</i>      | 11   | $\geq$ 128 | 16                      | OXA-48        | (4x)CTX-M-15                 | OXA-1, SHV-11                   | -                             | PBP-2 (M522V) | RamR NF (D75fs)                        |
| AI2873     | <i>K. pneumoniae</i>      | 11   | $\geq$ 128 | 32                      | OXA-48        | (3x)CTX-M-15                 | OXA-1, SHV-11                   | -                             | PBP-2 (M522V) | RamR NF (D75fs)                        |
| AI2876     | <i>K. pneumoniae</i>      | 11   | $\geq$ 128 | 32                      | OXA-48        | (3x)CTX-M-15                 | SHV-11                          | OmpK35 NF (L103fs)            | -             | RamR NF (D75fs)                        |
| AI2877     | <i>K. pneumoniae</i>      | 11   | $\geq$ 128 | 16                      | OXA-48        | (3x)CTX-M-15                 | OXA-1, SHV-11                   | OmpK36 (AL233-234GT)          | PBP-2 (M522V) | RamR NF (D75fs)                        |
| AI2913     | <i>K. aerogenes</i>       | 57   | 16         | 16                      | OXA-48        |                              | (4x)OXA-1, EC-like, TEM-1       | OmpK36 (M70T, T45S)           | -             | -                                      |
| AI2914     | <i>K. pneumoniae</i>      | 11   | $\geq$ 128 | 16                      | OXA-48        | (2x)CTX-M-15                 | SHV-11                          | OmpK36 (L9Q, W94_T95del/insA) | -             | RamR NF (D75fs)                        |

|        |                           |      |      |      |        |                  |                             |                                  |                                     |                 |
|--------|---------------------------|------|------|------|--------|------------------|-----------------------------|----------------------------------|-------------------------------------|-----------------|
| AI2917 | <i>K. pneumoniae</i>      | 392  | ≥128 | ≥128 | OXA-48 | CTX-M-15         | OXA-1, TEM-1, SHV-11        | -                                | -                                   | -               |
| AI2935 | <i>C. freundii</i>        | 112  | ≥128 | 32   | OXA-48 | CTX-M-9-like     | CMY-75                      | OmpK36 NF (D181_F187del/insGM)   | PBP2 (A438S, F489L)<br>PBP3 (A462S) | AcrR NF (S219*) |
| AI2950 | <i>E. cloacae</i> complex | 66   | 16   | 16   | OXA-48 | CTX-M-15         | OXA-1, TEM-1, ACT-like-like | -                                | -                                   | -               |
| AI2953 | <i>K. pneumoniae</i>      | 307  | ≥128 | 16   | OXA-48 | SHV-28, CTX-M-15 | OXA-1, TEM-1                | -                                | -                                   | -               |
| AI2954 | <i>K. pneumoniae</i>      | 11   | ≥128 | ≥128 | OXA-48 | (2x)CTX-M-15     | OXA-1, SHV-11               | OmpK36 (Q313K)                   | -                                   | RamR NF (D75fs) |
| AI2962 | <i>K. pneumoniae</i>      | 307  | ≥128 | 16   | OXA-48 | SHV-28, CTX-M-15 | OXA-1, TEM-1                | OmpK35 (E269*)<br>OmpK36 (W125*) | -                                   | -               |
| AI3039 | <i>K. pneumoniae</i>      | 307  | ≥128 | 16   | OXA-48 | SHV-28, CTX-M-15 | OXA-1, TEM-1                | OmpK36 (G134_D135insGD)          | -                                   | -               |
| AI3062 | <i>K. pneumoniae</i>      | 5000 | ≥128 | 32   | OXA-48 | (2x)CTX-M-15     | OXA-1, TEM-1, SHV-11        | -                                | -                                   | -               |
| AN2342 | <i>K. pneumoniae</i>      | 147  | ≥128 | 16   | OXA-48 | CTX-M-15         | SHV-11                      | -                                | -                                   | -               |
| AN2352 | <i>K. pneumoniae</i>      | 147  | ≥128 | 32   | OXA-48 | (2x)CTX-M-15     | SHV-11                      | OmpK36 (G134_D135insGD)          | -                                   | -               |
| AN2357 | <i>K. pneumoniae</i>      | 15   | ≥128 | 16   | OXA-48 | SHV-28, CTX-M-15 | OXA-1                       | -                                | -                                   | -               |
| AN2361 | <i>K. pneumoniae</i>      | 15   | ≥128 | 16   | OXA-48 | CTX-M-15         | OXA-1, SHV-28, TEM-1        | -                                | -                                   | -               |

(2x), (3x) and (4x): indicate that the strain has 2, 3 or 4 copies of the gene coding for the specified  $\beta$ -lactamase, respectively. NF: indicates non-functional; asterisk (\*): indicates premature stop codon; fs: indicates frameshifts.
